# Supplementary material for: An ingeniously assembled metal–organic framework on the surface of FeMn co-doped Ni(OH)2 as a high-efficiency electrocatalyst for the oxygen evolution reaction
Source: Royal Society of Chemistry journal article supplement (doi:10.1039/d1dt02127c), 2021-01-01
Supplement: d1dt02127c1.pdf [file d1dt02127c1.pdf]

## Supporting Information

### **Ingeniously assemble metal organic framework on the surface of FeMn co-doped Ni(OH)<sub>2</sub> as a high-efficiency electrocatalyst for oxygen evolution reaction**

Lei Ye <sup>a</sup>, Yeqing Zhang <sup>a</sup>, Meilin Zhang <sup>a</sup>, Yaqiong Gong <sup>a,b,\*</sup>

*a School of Chemical Engineering and Technology, North University of China, Taiyuan 030051, PR China.*

*b State Key Laboratory of Physical Chemistry of Solid Surfaces, Xiamen University, Xiamen 361005, PR China.*

\* Email: [gyq@nuc.edu.cn](mailto:gyq@nuc.edu.cn) (Yaqiong Gong)

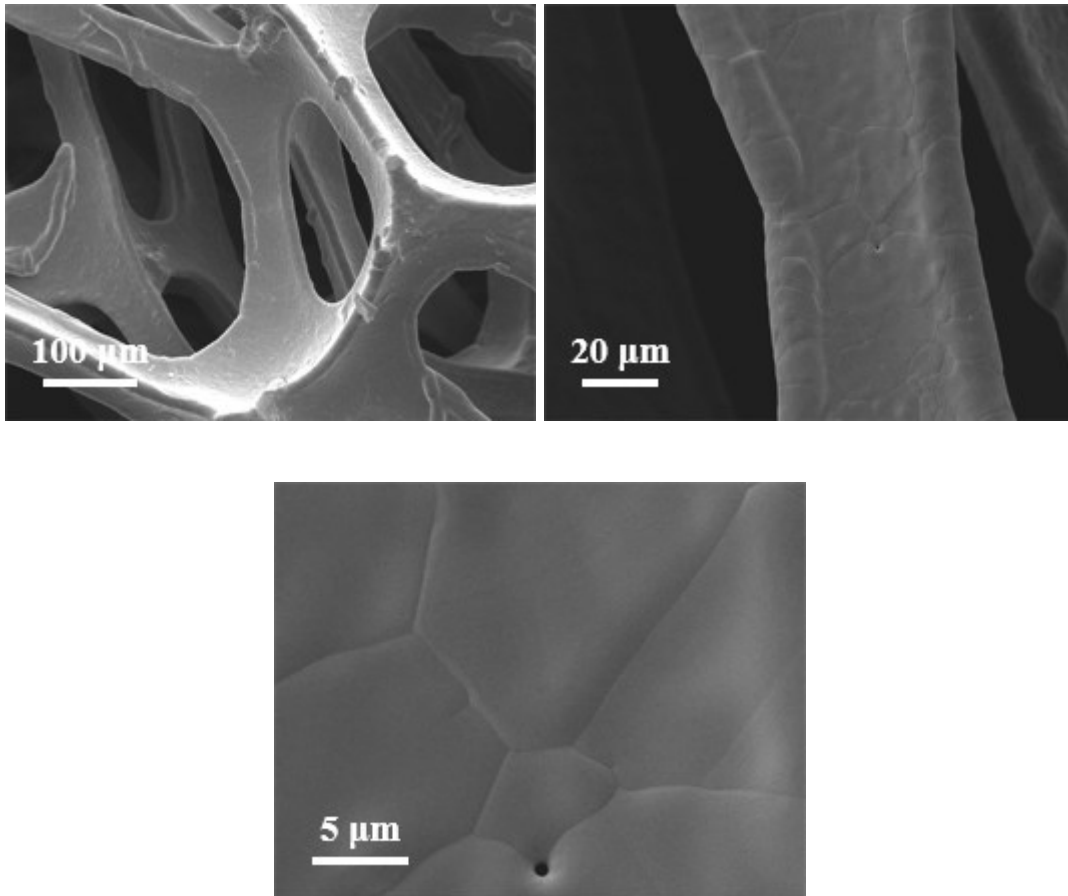

**Fig. S1.** SEM images of bare NF.

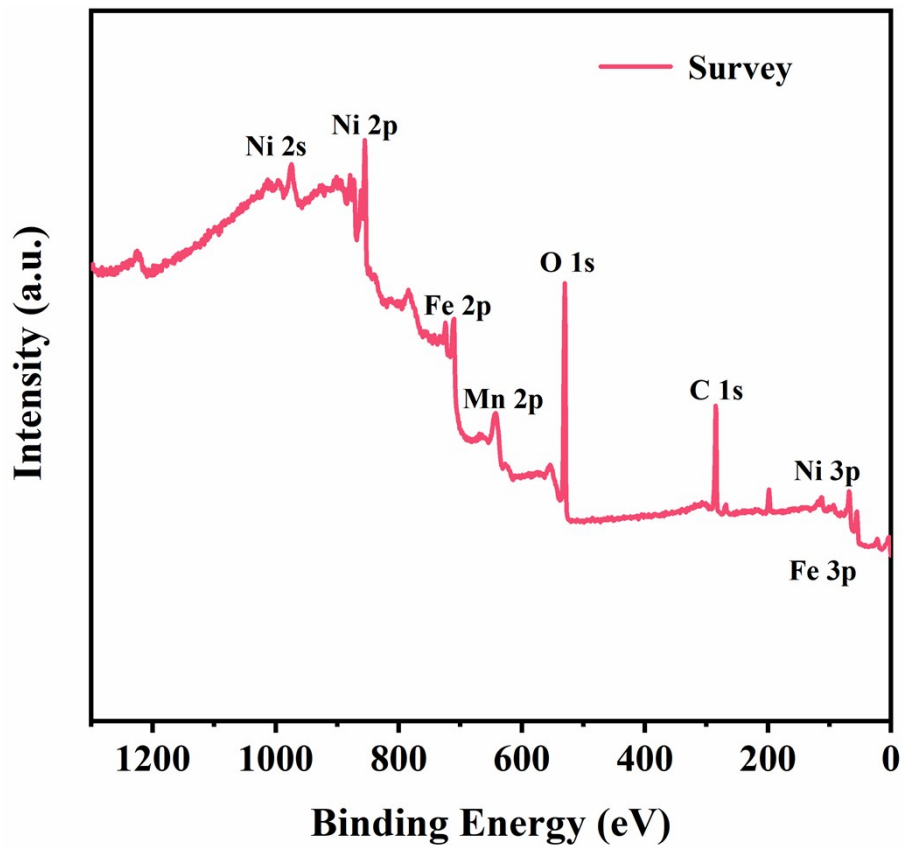

**Fig. S2.** The XPS survey spectra of FeMn-Ni(OH)<sub>2</sub>@MOF/NF.

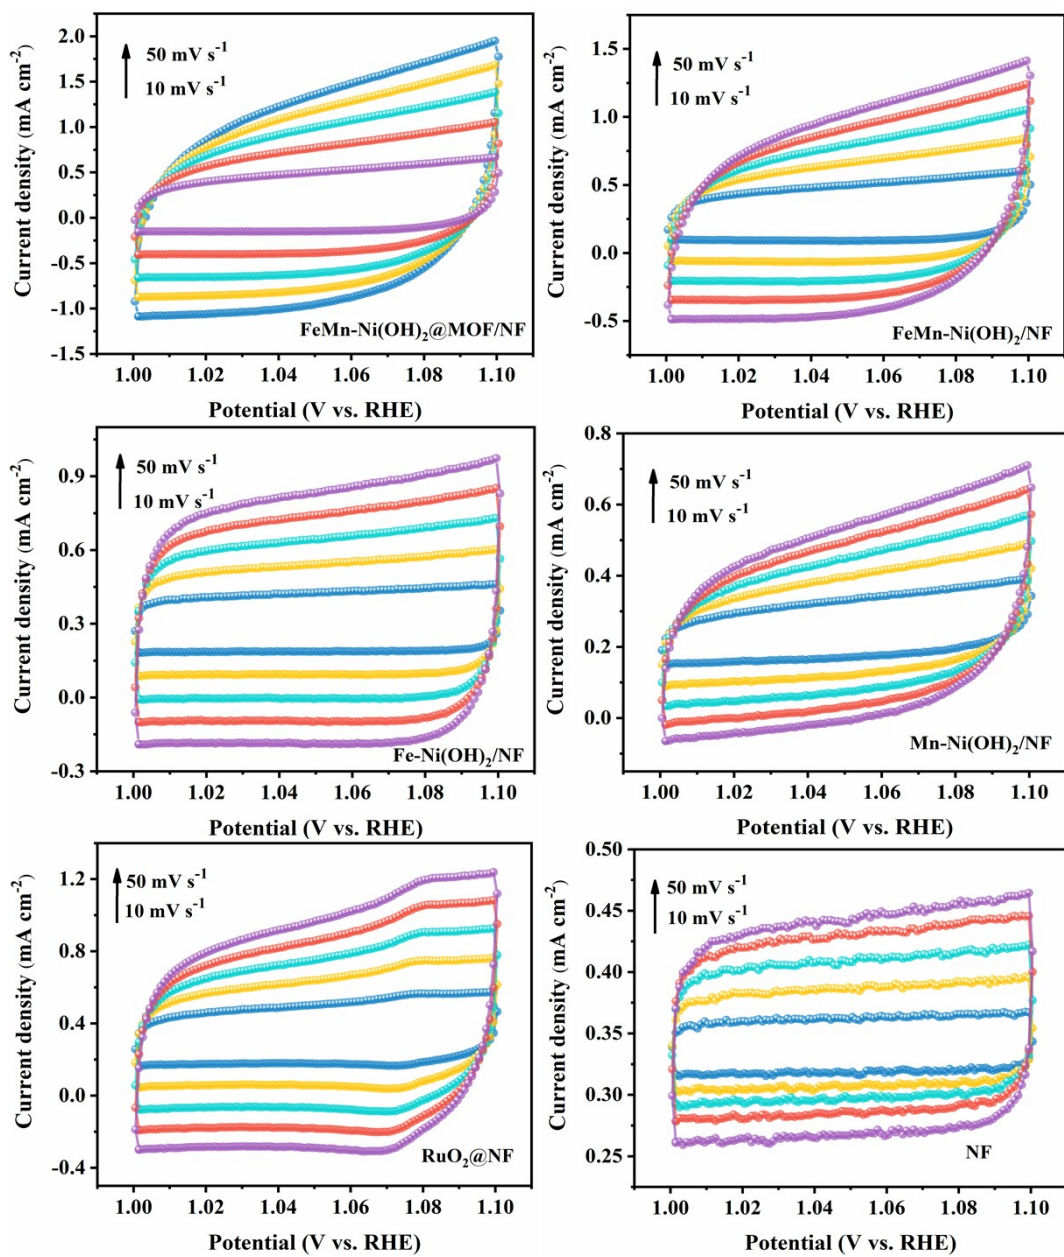

**Fig. S3.** Cyclic voltammetry curves of FeMn-Ni(OH)<sub>2</sub>@MOF/NF, FeMn-Ni(OH)<sub>2</sub>/NF, Fe-Ni(OH)<sub>2</sub>/NF, Mn-Ni(OH)<sub>2</sub>/NF, RuO<sub>2</sub>@NF and bare NF.

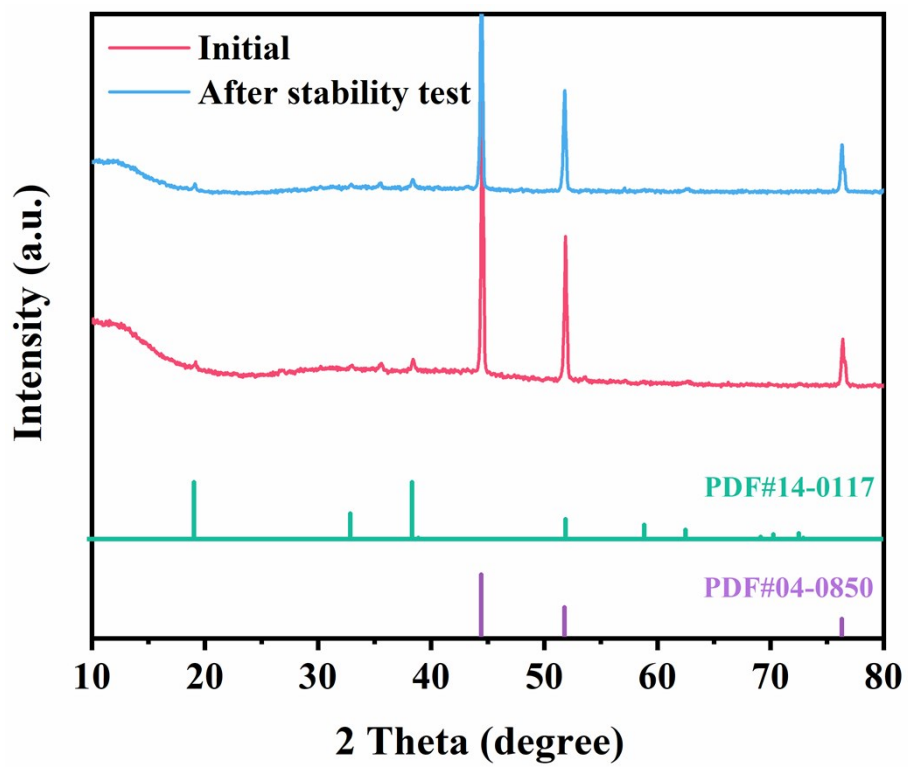

**Fig. S4.** XRD pattern of FeMn-Ni(OH)<sub>2</sub>@MOF/NF before and after the stability test.

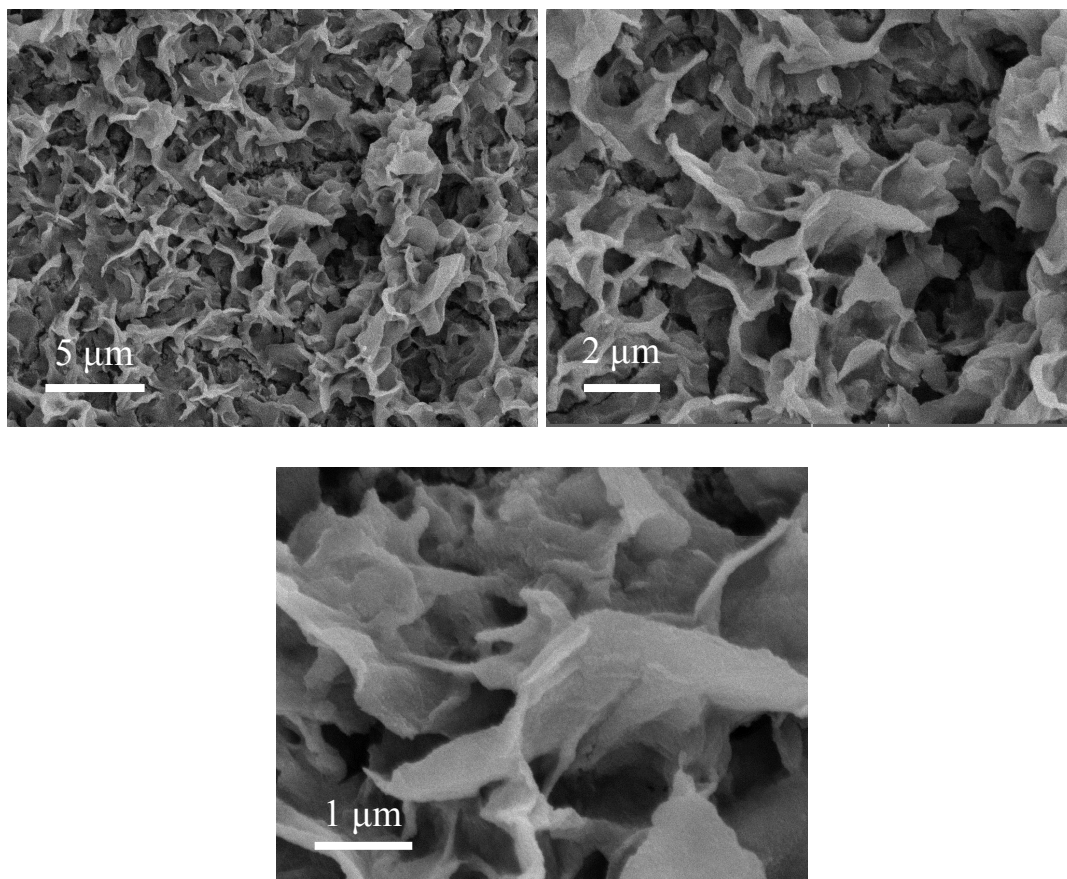

**Fig. S5.** The SEM images of FeMn-Ni(OH)<sub>2</sub>@MOF/NF after the stability test.

**Table S1.** Comparison of OER activity between FeMn-Ni(OH)<sub>2</sub>@MOF/NF and other recently reported non noble metal catalysts.

| Catalyst                             | Current density (mA·cm <sup>-2</sup> ) | Overpotential (mV) | Tafel slope (mV·dec <sup>-1</sup> ) | Reference |
|--------------------------------------|----------------------------------------|--------------------|-------------------------------------|-----------|
| FeMn-Ni(OH) <sub>2</sub> @MOF/NF     | 10                                     | 199                | 26                                  | this work |
| NiFe-MOF-74/NF                       | 10                                     | 223                | 71.6                                | 1         |
| Fe <sub>1</sub> Ni <sub>2</sub> -BDC | 10                                     | 260                | 35                                  | 2         |
| MIL-53(FeNi)/NF                      | 50                                     | 233                | 31.3                                | 3         |
| NiFe-MOF/OM-NFH                      | 10                                     | 270                | 123                                 | 4         |
| Fe MOF/IF                            | 50                                     | 240                | 72                                  | 5         |
| NiFe-MOF                             | 50                                     | 270                | 49                                  | 6         |
| NiFe(dobpdc)                         | 10                                     | 207                | 36                                  | 7         |
| NiFe-NFF                             | 10                                     | 227                | 38.9                                | 8         |
| NiFe-MS/MOF@NF                       | 50                                     | 230                | 32                                  | 9         |
| NiFe-NCs                             | 10                                     | 271                | 48                                  | 10        |

**Table S2** The R<sub>ct</sub> values of different samples.

| Catalyst                         | R <sub>ct</sub> (Ω) | R <sub>s</sub> (Ω) |
|----------------------------------|---------------------|--------------------|
| FeMn-Ni(OH) <sub>2</sub> @MOF/NF | 0.558               | 1.566              |
| FeMn-Ni(OH) <sub>2</sub> /NF     | 0.749               | 1.906              |
| Fe-Ni(OH) <sub>2</sub> /NF       | 7.485               | 1.876              |
| Mn-Ni(OH) <sub>2</sub> /NF       | 109.4               | 1.825              |
| RuO <sub>2</sub> @NF             | 3.708               | 2.074              |
| NF                               | 157.2               | 1.983              |

## Reference

- 1 J. Xing, K. Guo, Z. Zou, M. Cai, J. Du and C. Xu, *Chem. Commun.*, 2018, **54**, 7046-7049.
- 2 J. Li, W. Huang, M. Wang, S. Xi, J. Meng, K. Zhao, J. Jin, W. Xu, Z. Wang, X. Liu, Q. Chen, L. Xu, X. Liao, Y. Jiang, K. A. Owusu, B. Jiang, C. Chen, D. Fan, L. Zhou and L. Mai, *ACS Energy Lett.*, 2018, **4**, 285-292.
- 3 F. Sun, G. Wang, Y. Ding, C. Wang, B. Yuan and Y. Lin, *Adv. Energy Mater.*, 2018, **8**, 1800574.
- 4 A. Kumar and S. Bhattacharyya, *ACS Appl. Mater. Interfaces*, 2017, **9**, 41906-41915.
- 5 F. Zheng, D. Xiang, P. Li, Z. Zhang, C. Du, Z. Zhuang, X. Li and W. Chen, *ACS Sustainable Chem. Eng.*, 2019, **7**, 9743-9749.
- 6 L. Qi, Y.-Q. Su, Z. Xu, G. Zhang, K. Liu, M. Liu, E. J. M. Hensen and R. Y.-Y. Lin, *J. Mater. Chem. A*, 2020, **8**, 22974-22982.
- 7 C. Cao, D. D. Ma, Q. Xu, X. T. Wu and Q. L. Zhu, *Adv. Funct. Mater.*, 2018, **29**, 1807418.
- 8 X. Zhang, Q. Liu, X. Shi, A. M. Asiri and X. Sun, *Inorg. Chem. Front.*, 2018, **5**, 1405-1408.
- 9 M. Zhao, W. Li, J. Li, W. Hu and C. M. Li, *Adv Sci (Weinh)*, 2020, **7**, 2001965.
- 10 X. Li, D. D. Ma, C. Cao, R. Zou, Q. Xu, X. T. Wu and Q. L. Zhu, *Small*, 2019, **15**, e1902218.
